# Supplementary material
Source: PubMed Central journal article supplement (PMC123266)
Supplement: pnas_162370099_2.pdf [file pnas_162370099_2.pdf]

**Table 5. All genes differentially expressed in failing (F) and nonfailing (NF) hearts, classified into functional groups**

| <b>GenBank<br/>accession no.</b>  | <b>Name</b>                    | <b>Mean of NF,<br/>average<br/>difference units</b> | <b>Mean of F,<br/>average<br/>difference units</b> | <b>Fold<br/>change</b> |
|-----------------------------------|--------------------------------|-----------------------------------------------------|----------------------------------------------------|------------------------|
| <b>Biomarkers</b>                 |                                |                                                     |                                                    |                        |
| M31776                            | BNP                            | 751 ± 367                                           | 5,956 ± 1,908                                      | ↑ 7.9                  |
| M54951                            | ANF                            | 1,477 ± 1,228                                       | 6,249 ± 1,434                                      | ↑ 4.2                  |
| M25296                            | ANF precursor                  | 2,108 ± 751                                         | 6,986 ± 1,137                                      | ↑ 3.3                  |
| <b>Myofibrils</b>                 |                                |                                                     |                                                    |                        |
| M86406                            | α <sub>2</sub> -Actinin        | 988 ± 335                                           | 1,655 ± 510                                        | ↑ 1.7                  |
| U53445                            | Myosin heavy chain homolog     | 170 ± 54                                            | 285 ± 100                                          | ↑ 1.7                  |
| AF001548                          | Myosin heavy chain 11          | 615 ± 147                                           | 1,039 ± 369                                        | ↑ 1.7                  |
| M69181                            | Nonmuscle myosin heavy chain B | 480 ± 68                                            | 984 ± 228                                          | ↑ 2.0                  |
| D17408                            | Calponin                       | 1,931 ± 1,337                                       | 726 ± 2,825                                        | ↓ 2.7                  |
| J00073                            | α-Cardiac actin                | 13,060 ± 3,960                                      | 7,684 ± 2,369                                      | ↓ 1.7                  |
| <b>Extracellular/Cytoskeletal</b> |                                |                                                     |                                                    |                        |
| M55998                            | α1 collagen type I             | 716 ± 319                                           | 2,667 ± 1,199                                      | ↑ 3.7                  |

|                           |                                           |                 |                 |                  |
|---------------------------|-------------------------------------------|-----------------|-----------------|------------------|
| Z74616                    | Prepro- $\alpha$ 2(I) collagen            | 98 $\pm$ 79     | 485 $\pm$ 312   | $\uparrow$ 4.9   |
| U21128                    | Lumican                                   | 462 $\pm$ 158   | 1,753 $\pm$ 561 | $\uparrow$ 3.8   |
| X06700                    | Pro- $\alpha$ 1(III) collagen             | 156 $\pm$ 37    | 510 $\pm$ 229   | $\uparrow$ 3.3   |
| L25286                    | $\alpha$ 1 Type 15 collagen               | 176 $\pm$ 26    | 365 $\pm$ 123   | $\uparrow$ 2.1   |
| U05291                    | Cardiac fibromodulin                      | 406 $\pm$ 47    | 883 $\pm$ 452   | $\uparrow$ 2.2   |
| X02761                    | Fibronectin, alternative splice 1         | 283 $\pm$ 139   | 486 $\pm$ 113   | $\uparrow$ 1.7   |
| X52947                    | Connexin 43                               | 800 $\pm$ 352   | 1,440 $\pm$ 697 | $\uparrow$ 1.8   |
| HG2755                    | T-plastin                                 | 87 $\pm$ 54     | 234 $\pm$ 98    | $\uparrow$ 2.7   |
| U77718                    | Desmosome associated protein pinin        | 114 $\pm$ 37    | 202 $\pm$ 28    | $\uparrow$ 1.8   |
| U32944                    | Dynein                                    | 590 $\pm$ 188   | 1,068 $\pm$ 235 | $\uparrow$ 1.8   |
| X06956                    | Tubulin $\alpha$ 1                        | 1,574 $\pm$ 715 | 927 $\pm$ 205   | $\downarrow$ 1.7 |
| K03460                    | $\alpha$ -tubulin H2                      | 906 $\pm$ 194   | 529 $\pm$ 168   | $\downarrow$ 1.7 |
| <b>Proteolysis/Stress</b> |                                           |                 |                 |                  |
| Z19585                    | Thrombospondin-4                          | 293 $\pm$ 101   | 1,040 $\pm$ 425 | $\uparrow$ 3.5   |
| L02950                    | M $\mu$ -crystallin                       | 1,327 $\pm$ 372 | 3,389 $\pm$ 648 | $\uparrow$ 2.6   |
| D87258                    | Serine protease 11                        | 571 $\pm$ 130   | 1,057 $\pm$ 96  | $\uparrow$ 1.8   |
| D55696                    | Cysteine protease                         | 418 $\pm$ 318   | 808 $\pm$ 354   | $\uparrow$ 1.9   |
| M60974                    | DNA inducible gene GADD45                 | 375 $\pm$ 127   | 624 $\pm$ 104   | $\uparrow$ 1.7   |
| L08069                    | HSP, <i>Escherichia coli</i> DnaJ homolog | 184 $\pm$ 106   | 379 $\pm$ 68    | $\uparrow$ 2.1   |
| M84526                    | Adipsin                                   | 1,590 $\pm$ 611 | 768 $\pm$ 516   | $\downarrow$ 2.1 |

|                               |                                          |                |               |       |
|-------------------------------|------------------------------------------|----------------|---------------|-------|
| M14539                        | Factor XIII subunit                      | 915 ± 493      | 208 ± 614     | ↓ 4.4 |
| <b>Metabolism</b>             |                                          |                |               |       |
| S68805                        | Glycine amidinotransferase               | 239 ± 32       | 584 ± 249     | ↑ 2.4 |
| U37143                        | P450 monooxygenase                       | 526 ± 120      | 946 ± 117     | ↑ 1.8 |
| U03688                        | Dioxin-inducible cytochrome P450         | 157 ± 74       | 268 ± 111     | ↑ 1.7 |
| L05779                        | Cytosolic epoxide hydrolase              | 186 ± 23       | 365 ± 91      | ↑ 2.0 |
| X79440                        | NADP <sup>+</sup> dependent malic enzyme | 163 ± 54       | 308 ± 69      | ↑ 1.9 |
| U21931                        | Fructose-1,6-biophosphatase              | 138 ± 132      | 324 ± 127     | ↑ 2.3 |
| M36341                        | ADP-ribosylatoin factor 4                | 633 ± 97       | 1,046 ± 265   | ↑ 1.7 |
| M82809                        | Annexin IV                               | 142 ± 49       | 247 ± 51      | ↑ 1.7 |
| X76648                        | Glutaredosin                             | 557 ± 108      | 941 ± 250     | ↑ 1.7 |
| M12963                        | Alcohol dehydrogenase I                  | 723 ± 188      | 150 ± 239     | ↓ 4.8 |
| J02611                        | Apolipoprotein D                         | 10,417 ± 1,134 | 5,895 ± 2,007 | ↓ 1.8 |
| S80437                        | Fatty acid synthase                      | 259 ± 162      | 55 ± 108      | ↓ 4.6 |
| HG3945                        | Phospholipid transfer protein            | 409 ± 130      | 12 ± 203      | ↓ 35  |
| L00389                        | Cytochrome                               | 600 ± 221      | 363 ± 95      | ↓ 1.7 |
| D00632                        | Glutathione peroxidase                   | 7,256 ± 1,701  | 4,277 ± 763   | ↓ 1.7 |
| X59834                        | Glutamine synthase                       | 1,458 ± 514    | 787 ± 124     | ↓ 1.9 |
| M96859                        | Dipeptidyl aminopeptidase-like protein   | 286 ± 90       | 159 ± 91      | ↓ 1.8 |
| <b>Apoptosis/Inflammatory</b> |                                          |                |               |       |

|                           |                                  |             |             |       |
|---------------------------|----------------------------------|-------------|-------------|-------|
| M34057                    | TGFβ binding protein 1(LTBP1)    | 389 ± 161   | 799 ± 246   | ↑ 2.1 |
| Z37976                    | TGFβ binding protein 2(LTBP2)    | 212 ± 50    | 512 ± 83    | ↑ 2.4 |
| U19495                    | Intercrine-α (SDF1)              | 156 ± 58    | 282 ± 131   | ↑ 1.8 |
| X64177                    | Metallothionein                  | 2,799 ± 747 | 1,639 ± 853 | ↓ 1.7 |
| X76717                    | Metallothionein 1L               | 2,626 ± 680 | 1,490 ± 413 | ↓ 1.8 |
| X68733                    | α <sub>1</sub> -antichymotrypsin | 1,015 ± 234 | 493 ± 138   | ↓ 2.1 |
| Z22970                    | Hemoglobin scavenger receptor    | 667 ± 105   | 313 ± 56    | ↓ 2.1 |
| J03801                    | Lysozyme                         | 1,169 ± 402 | 537 ± 150   | ↓ 2.2 |
| X14008                    | Lysozyme                         | 1,102 ± 261 | 493 ± 138   | ↓ 2.1 |
| M19045                    | Lysozyme                         | 1,546 ± 558 | 709 ± 214   | ↓ 2.2 |
| <b>Signal Tranduction</b> |                                  |             |             |       |
| X57025                    | Insulin-derived growth factor 1  | 98 ± 26     | 205 ± 103   | ↑ 2.1 |
| U10550                    | Gem GTPase                       | 131 ± 29    | 359 ± 114   | ↑ 2.7 |
| M59287                    | CDC-like kinase 1                | 126 ± 45    | 341 ± 84    | ↑ 2.7 |
| X59798                    | Cyclin D1                        | 336 ± 166   | 813 ± 216   | ↑ 2.4 |
| M65292                    | Factor H related gene            | 445 ± 100   | 898 ± 348   | ↑ 2.0 |
| X62048                    | Wee 1 tyrosine kinase            | 141 ± 47    | 291 ± 116   | ↑ 2.1 |
| M27436                    | Tissue factor 3                  | 139 ± 40    | 286 ± 169   | ↑ 2.1 |
| X52541                    | Early response protein 1         | 129 ± 49    | 311 ± 112   | ↑ 2.4 |
| U66661                    | GABA-a receptor, ε subunit       | 176 ± 40    | 366 ± 93    | ↑ 2.1 |

|                      |                                                      |             |           |        |
|----------------------|------------------------------------------------------|-------------|-----------|--------|
| X89066               | Transient receptor potential channel 1               | 169 ± 70    | 311 ± 98  | ↑ 1.8  |
| M97675               | Receptor tyrosine-like kinase-like orphan receptor 1 | 194 ± 44    | 341 ± 66  | ↑ 1.8  |
| U31912               | Orphan nuclear receptor                              | 266 ± 131   | 469 ± 215 | ↑ 1.8  |
| L42379               | Bone-derived growth factor                           | 729 ± 476   | 20 ± 364  | ↓ 36   |
| L19267               | Myotonin protein kinase                              | 1,072 ± 709 | 217 ± 186 | ↓ 4.9  |
| M22430               | Phospholipase A2                                     | 1,563 ± 673 | 304 ± 92  | ↓ 5.1  |
| X07315               | Nuclear transport factor                             | 255 ± 127   | 32 ± 152  | ↓ 7.8  |
| U48707               | Protein phosphatase inhibitor                        | 1,412 ± 171 | 739 ± 85  | ↓ 1.9  |
| M80359               | MAP/microtubule affinity regulating kinase 3         | 319 ± 72    | 96 ± 112  | ↓ 3.3  |
| Y00285               | IGF-II receptor                                      | 498 ± 170   | 267 ± 150 | ↓ 1.9  |
| <b>Transcription</b> |                                                      |             |           |        |
| D13666               | Osteoblast specific factor 2                         | 40 ± 39     | 474 ± 281 | ↑ 12.0 |
| M92934               | Connective tissue growth factor                      | 246 ± 110   | 794 ± 435 | ↑ 3.2  |
| X59065               | Fibroblast specific factor 2                         | 210 ± 72    | 425 ± 135 | ↑ 2.0  |
| L08895               | MADS/MEF2-family transcription factor                | 153 ± 25    | 295 ± 97  | ↑ 1.9  |
| M57399               | Nerve growth factor 1                                | 400 ± 91    | 683 ± 253 | ↑ 1.7  |
| M60278               | Heprin-binding EGF-like growth factor                | 253 ± 110   | 530 ± 211 | ↑ 2.1  |
| M74719               | Transcription factor 4                               | 321 ± 77    | 562 ± 222 | ↑ 1.7  |

|                      |                                                  |             |             |        |
|----------------------|--------------------------------------------------|-------------|-------------|--------|
| X72889               | Human brahma related gene 1                      | 321 ± 159   | 550 ± 175   | ↑ 1.7  |
| J02621               | Non-histone chromosomal protein,<br>HMG-14       | 306 ± 73    | 514 ± 141   | ↑ 1.7  |
| X13546               | Non-histone chromosomal protein,<br>HMG-17       | 627 ± 149   | 1,306 ± 371 | ↑ 2.1  |
| U50950               | Origin recognition complex, subunit 3            | 180 ± 78    | 300 ± 79    | ↑ 1.7  |
| L13391               | Regulation of G protein signaling 2              | 141 ± 73    | 271 ± 75    | ↑ 1.9  |
| U81001               | SNRPN                                            | 213 ± 101   | 405 ± 129   | ↑ 1.9  |
| X74874               | RNA polymerase II largest subunit                | 151 ± 40    | 257 ± 75    | ↑ 1.7  |
| U31903               | CREB-related protein                             | 350 ± 124   | 595 ± 264   | ↑ 1.7  |
| <b>Immune System</b> |                                                  |             |             |        |
| K02765               | Complete component C3                            | 1,071 ± 332 | 230 ± 110   | ↓ 4.6  |
| X72177               | Complete component C6                            | 834 ± 129   | 1,401 ± 311 | ↑ 1.7  |
| M14058               | Complement C1r                                   | 1,013 ± 300 | 564 ± 176   | ↓ 1.8  |
| K03430               | Complete C1qB-chain                              | 566 ± 196   | 273 ± 194   | ↓ 2.1  |
| M33195               | Fc-epsilon-receptor $\gamma$ -chain              | 316 ± 64    | 67 ± 64     | ↓ 4.7  |
| U42031               | Progesterone receptor-associated<br>immunophilin | 456 ± 167   | 169 ± 109   | ↓ 2.7  |
| M26311               | Cystic fibrosis antigen                          | 294 ± 114   | 22 ± 68     | ↓ 13.0 |
| <b>Unknown</b>       |                                                  |             |             |        |

|        |                               |             |             |       |
|--------|-------------------------------|-------------|-------------|-------|
| Z24724 | Poly(A) site DNA              | 196 ± 81    | 540 ± 114   | ↑ 2.7 |
| X82456 | Lim and SH3 domain protein 1  | 294 ± 107   | 511 ± 92    | ↑ 1.7 |
| D38548 | KIAA0076                      | 355 ± 151   | 153 ± 88    | ↓ 2.3 |
| D28589 | KIAA00167                     | 1,084 ± 343 | 526 ± 117   | ↓ 2.1 |
| D87451 | KIAA0262                      | 1,904 ± 373 | 1,135 ± 309 | ↓ 1.7 |
| X59766 | Zinc- $\alpha$ 2-glycoprotein | 366 ± 101   | 199 ± 65    | ↓ 1.8 |

Genes in each class were ranked by fold change and expression level.
